# Supplementary material for: Histone deacetylase inhibitors exert anti-tumor effects on human adherent and stem-like glioma cells
Source: PubMed Central journal article supplement (PMC6337817; doi:10.1186/s13148-018-0598-5), 2019-01-17

**A****U-87 MG****LN18****HDAC1****HDAC2****HDAC1****HDAC2**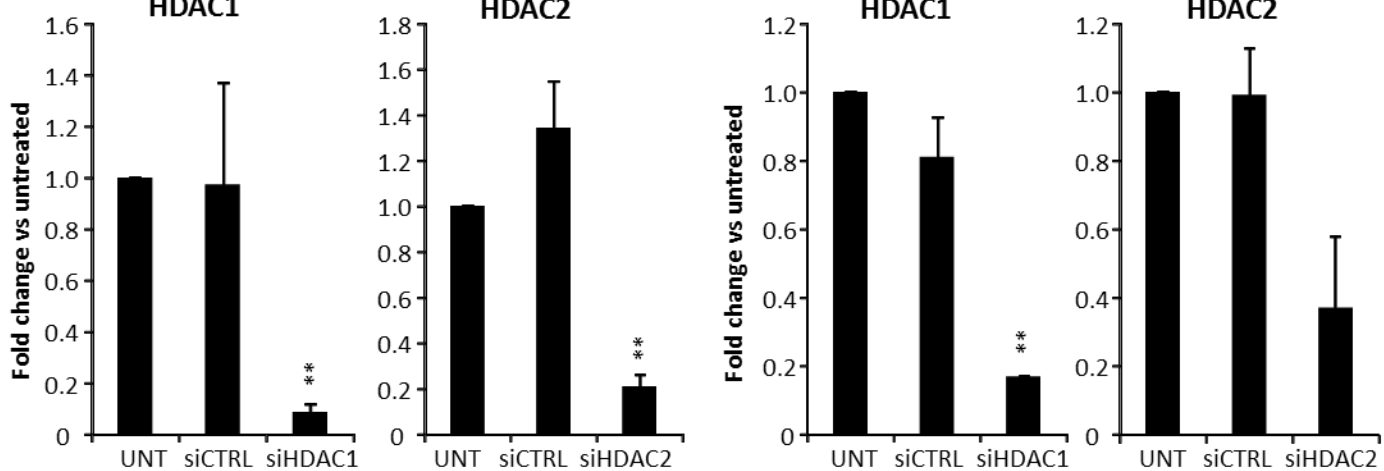**B****U-87 MG****LN18****H3Ac****H3Ac**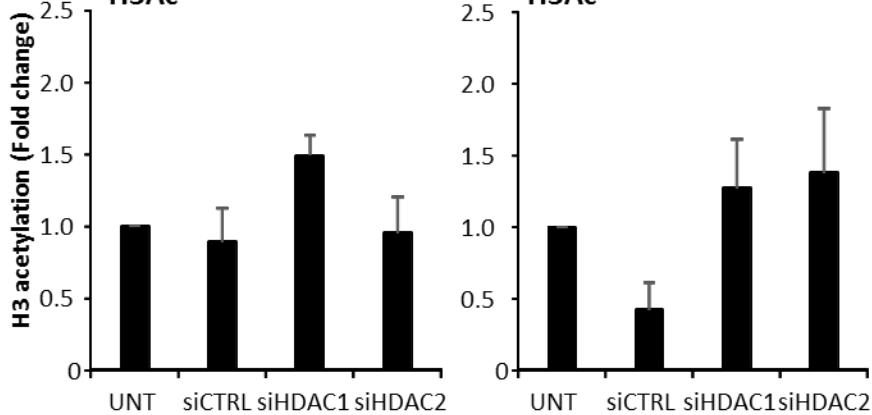**H4Ac****H4Ac**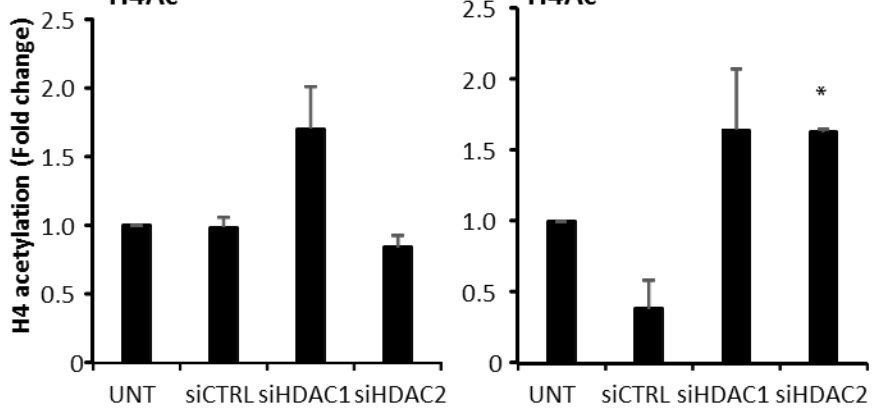

Supplement: 13148_2018_598_MOESM1_ESM.pdf [file 13148_2018_598_MOESM1_ESM.pdf]
