# Supplementary material for: Histone deacetylase inhibitors exert anti-tumor effects on human adherent and stem-like glioma cells
Source: PubMed Central journal article supplement (PMC6337817; doi:10.1186/s13148-018-0598-5), 2019-01-17

**A**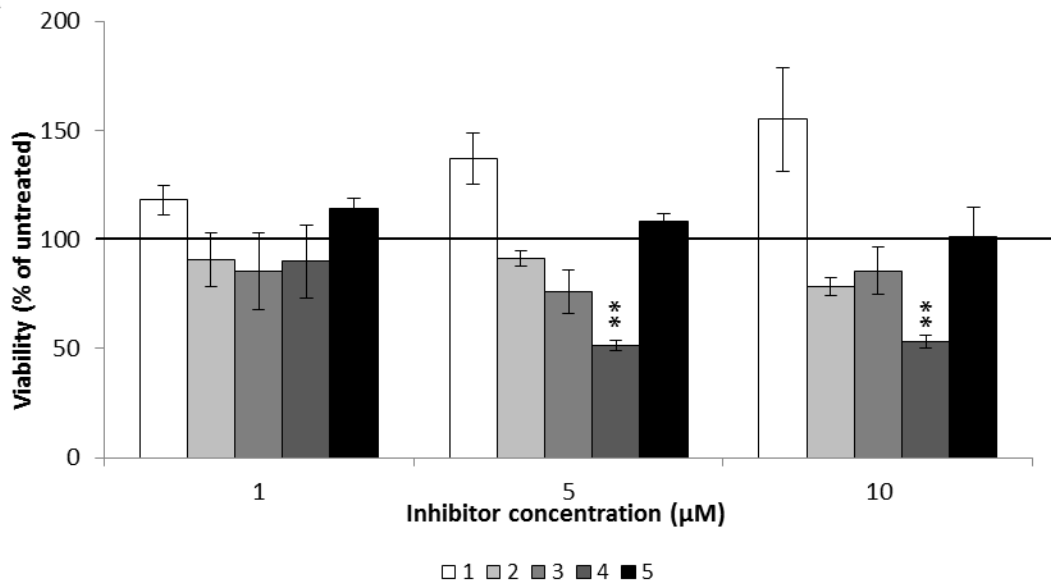**B**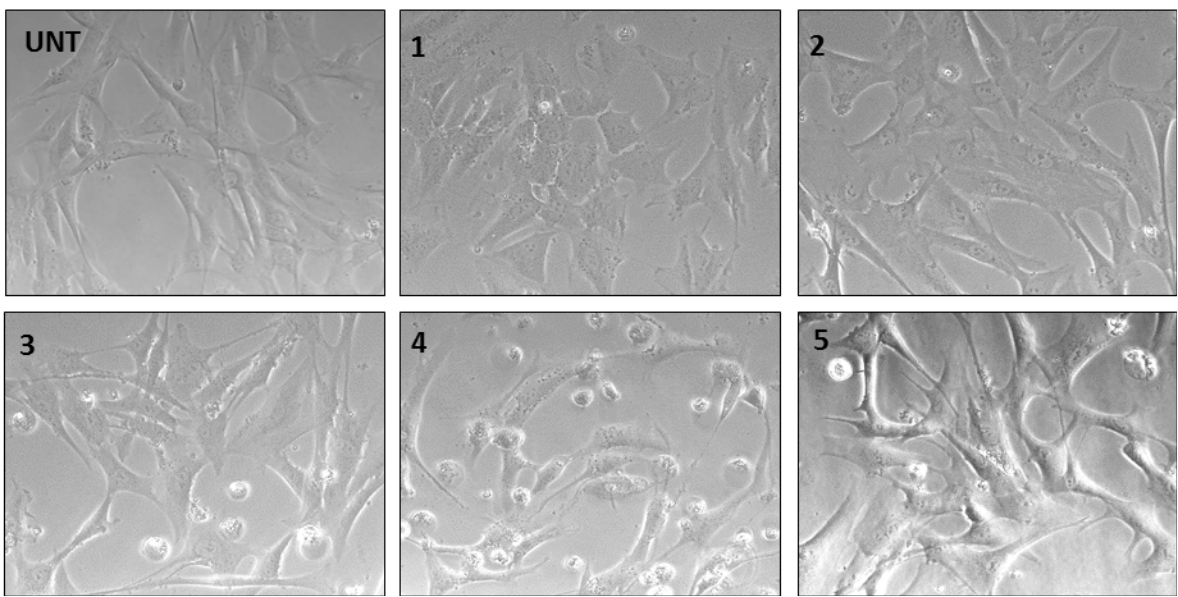

Supplement: 13148_2018_598_MOESM2_ESM.pdf [file 13148_2018_598_MOESM2_ESM.pdf]
